# Supplementary material for: SUMO Pathway Dependent Recruitment of Cellular Repressors to Herpes Simplex Virus Type 1 Genomes
Source: PubMed Central journal article supplement (PMC3136452; doi:10.1371/journal.ppat.1002123), 2011-07-14

**A:** HF based shLuci PML isoform reconstituted cells

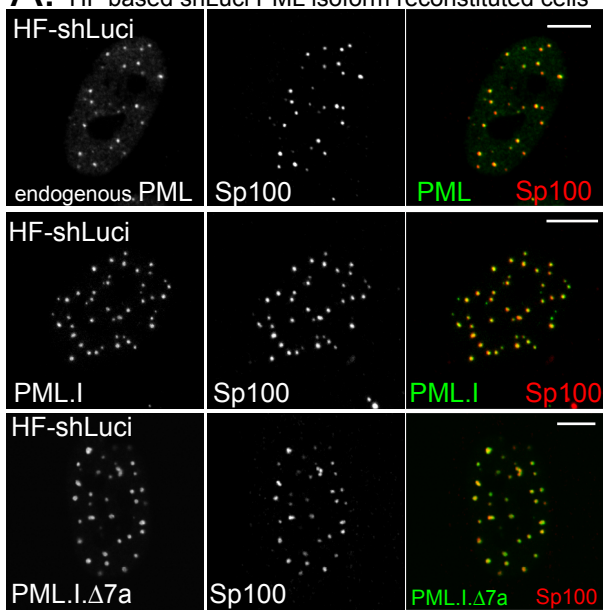

**B:** HF based shPML PML isoform reconstituted cells

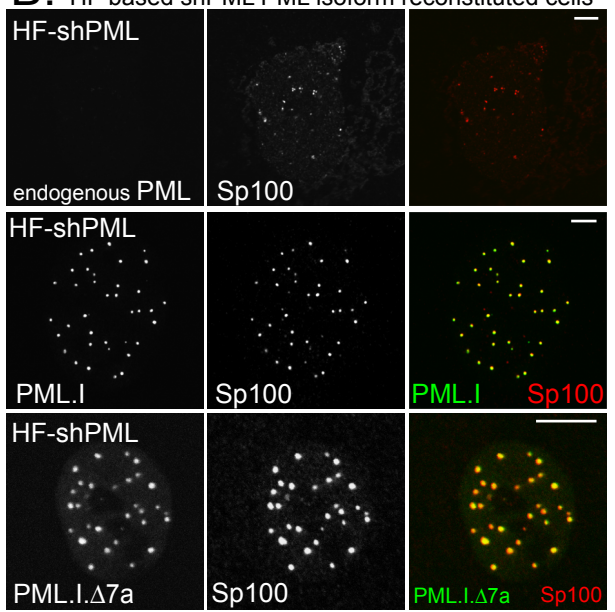

Supplement: ppat.1002123.s003.pdf [file ppat.1002123.s003.pdf]
