# Supplementary material for: SUMO Pathway Dependent Recruitment of Cellular Repressors to Herpes Simplex Virus Type 1 Genomes
Source: PubMed Central journal article supplement (PMC3136452; doi:10.1371/journal.ppat.1002123), 2011-07-14

**A:** uninfected HepaRG based cells

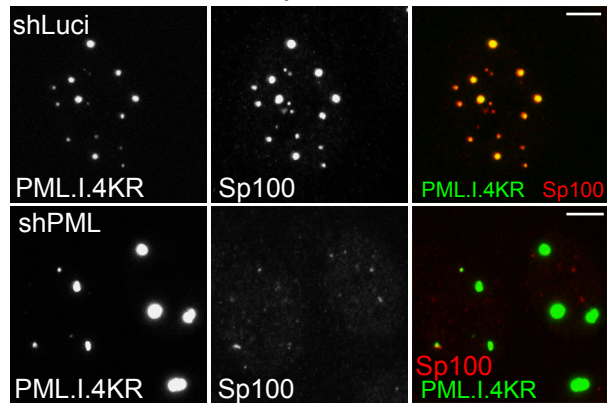

**B:** From Figure 3D

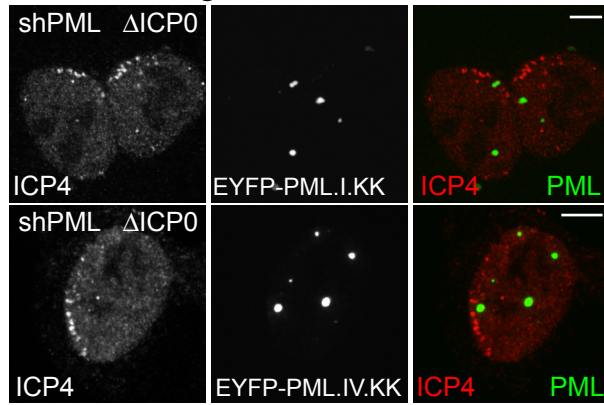

**C:** infected HepaRG based cells

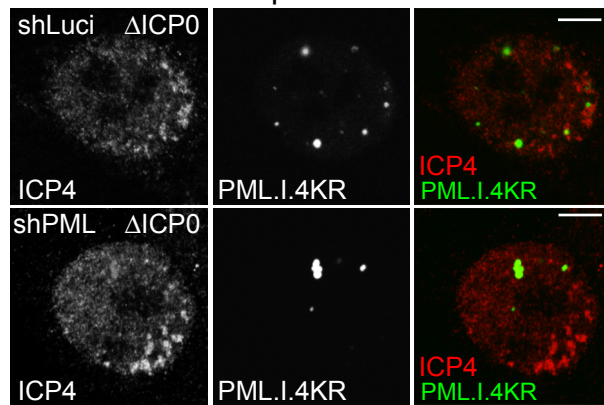

Supplement: ppat.1002123.s008.pdf [file ppat.1002123.s008.pdf]
