# Supplementary material for: SUMO Pathway Dependent Recruitment of Cellular Repressors to Herpes Simplex Virus Type 1 Genomes
Source: PubMed Central journal article supplement (PMC3136452; doi:10.1371/journal.ppat.1002123), 2011-07-14

**A:** uninfected HF based cells

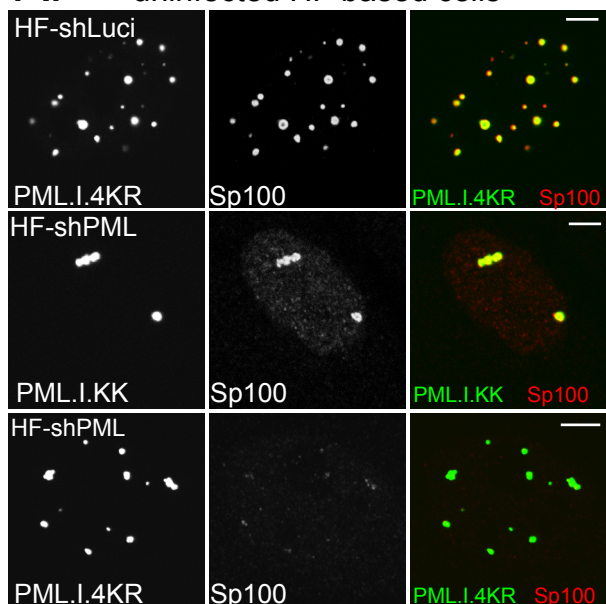

**B:** infected HF based cells

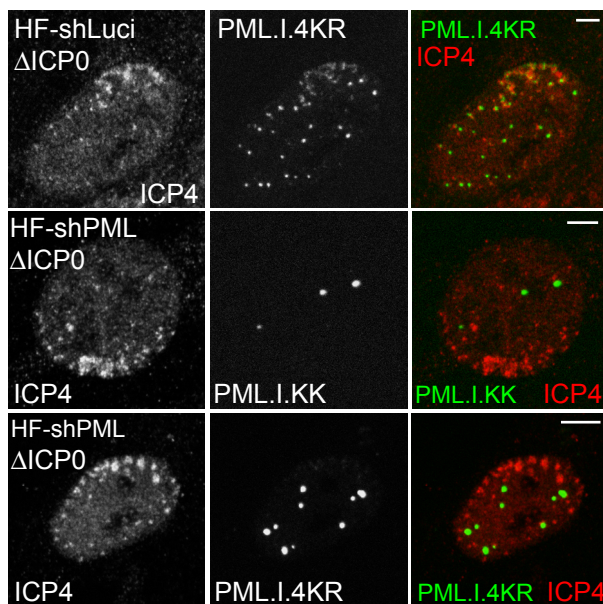

Supplement: ppat.1002123.s009.pdf [file ppat.1002123.s009.pdf]
